# Supplementary material
Source: Springer Nature journal article supplement (https://www.springermedizin.de/resource/supplementary/12889_2007_988_MOESM2_ESM.pdf/9502560)

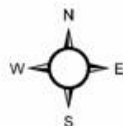

**N=66**  
**(37.71%)**

**Legend**

-  Members of ED-Syndromic Surveillance System Hospitals
-  Northern Taiwan
-  Central Taiwan
-  Southern Taiwan
-  Eastern Taiwan

**N=52**  
**(36.11%)**

**N=9**  
**(56.25%)**

**N=62**  
**(31.63%)**

0 10 20 40 60 80 Miles

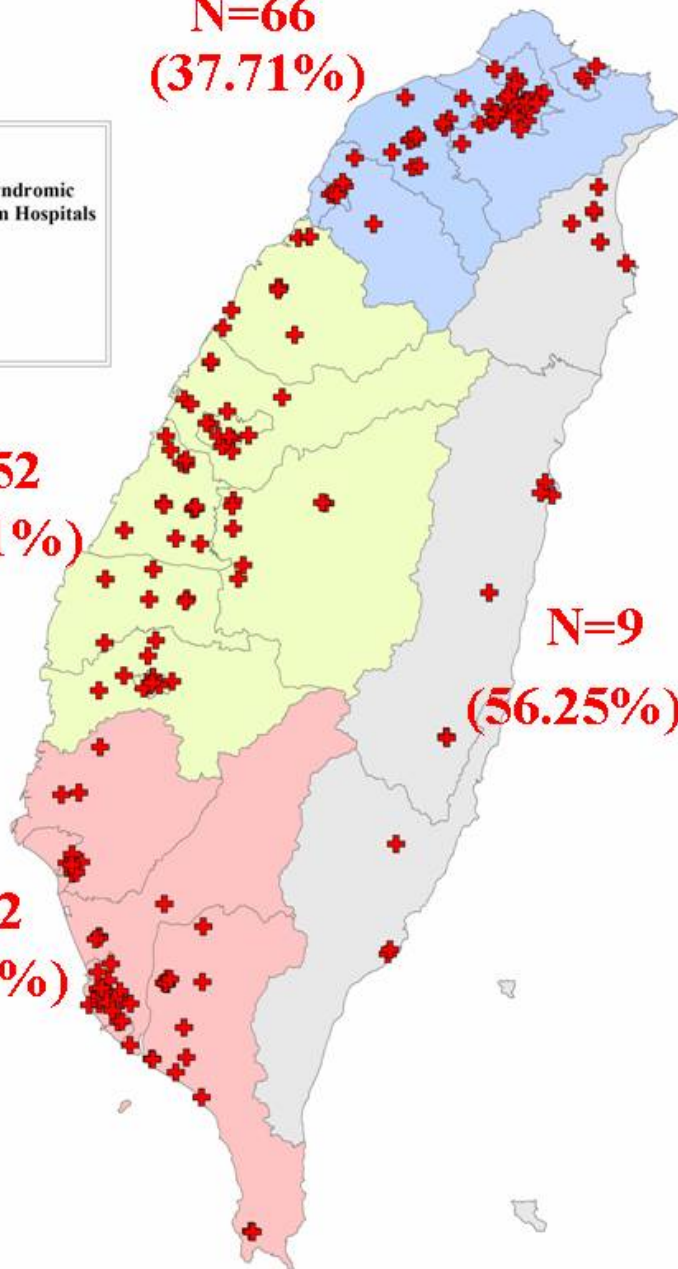

Supplement: MOESM2 [file 9502560]
